# Supplementary material
Source: MDPI journal article supplement (https://www.mdpi.com/search?q=materials-11-02539)
Supplement: s001 [file materials-11-02539-s001.pdf]

Article

# Synthesis and Properties of Magnetic Aryl-Imidazolium Ionic Liquids with Dual Brønsted/Lewis Acidity

Jui-Cheng Chang <sup>1,2,\*</sup>, Che-Hsuan Yang <sup>3,†</sup>, I-Wen Sun <sup>3</sup>, Wen-Yueh Ho <sup>4,\*</sup> and Tzi-Yi Wu <sup>1</sup>

<sup>1</sup> Department of Chemical and Materials Engineering, National Yunlin University of Science and Technology, Yunlin 64002, Taiwan; wuty@yuntech.edu.tw

<sup>2</sup> Bachelor Program in Interdisciplinary Studies, National Yunlin University of Science and Technology, Yunlin 64002, Taiwan

<sup>3</sup> Department of Chemistry, National Cheng Kung University, Tainan 70101, Taiwan; yangvul3rm03@gmail.com (C.-H.Y.); iwsun@mail.ncku.edu.tw (I.-W.S.)

<sup>4</sup> Department of Cosmetic Science, Chia Nan University of Pharmacy & Science, Tainan 71710, Taiwan

\* Correspondence: changjui@yuntech.edu.tw (J.-C.C.); rickho@mail.cnu.edu.tw (W.-Y.H.);

Tel.: +886-5-534-2601 (ext. 4685) (J.-C.C.); +886-6-266-4911 (ext. 2418) (W.-Y.H.);

Fax: +886-5-531-2071 (J.-C.C.); +886-6-266-7324 (W.-Y.H.)

† These authors contributed equally to this work

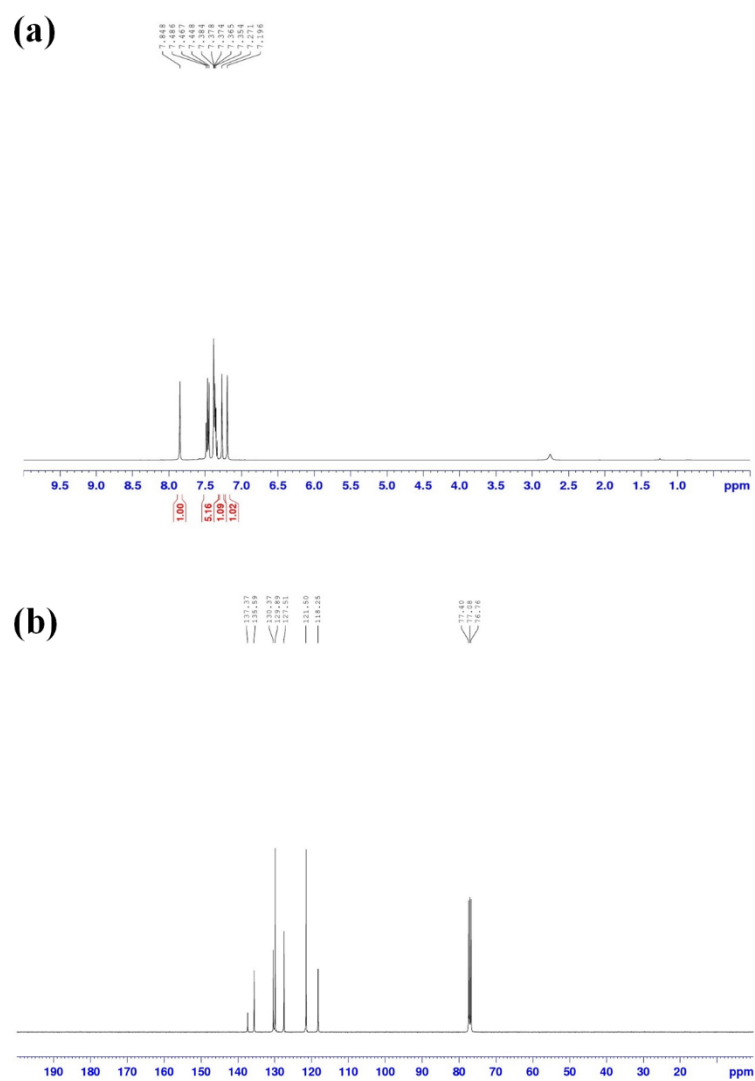

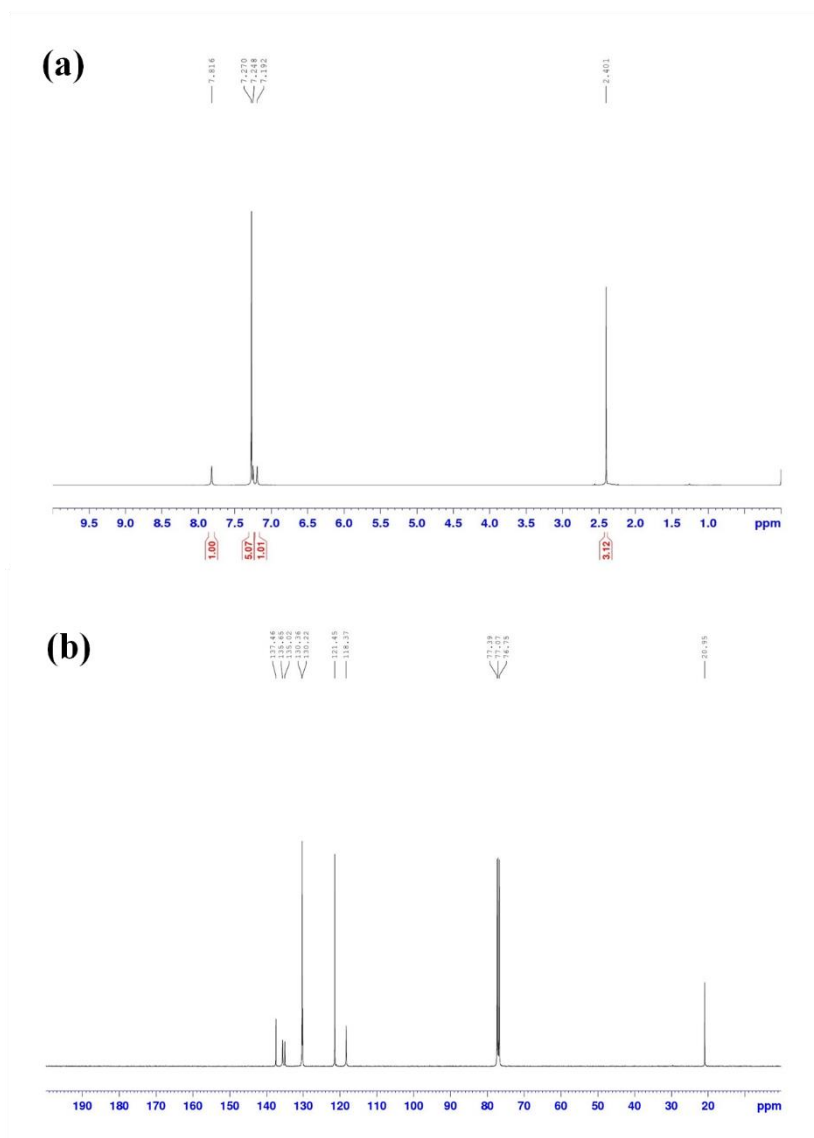

Figure S1b. (a)  $^1\text{H}$  and (b)  $^{13}\text{C}$  NMR spectra of 3b.

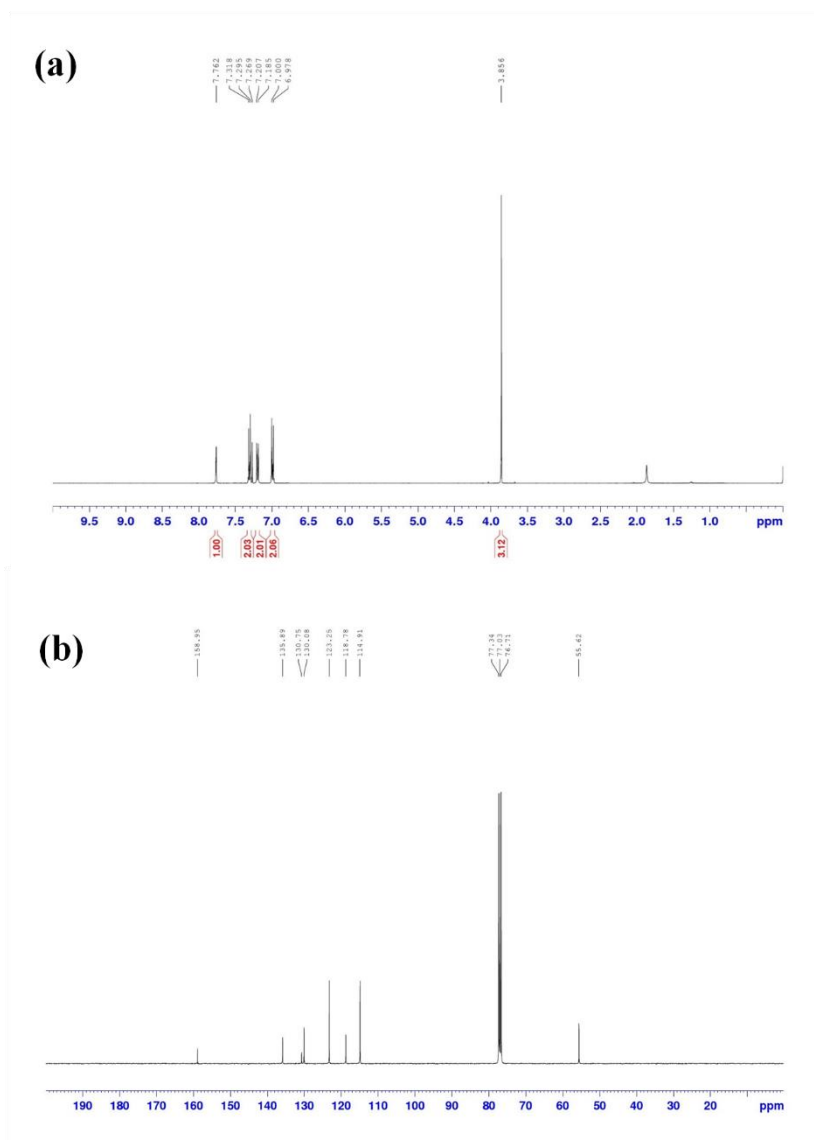

Figure S1c. (a)  $^1\text{H}$  and (b)  $^{13}\text{C}$  NMR spectra of 3c.

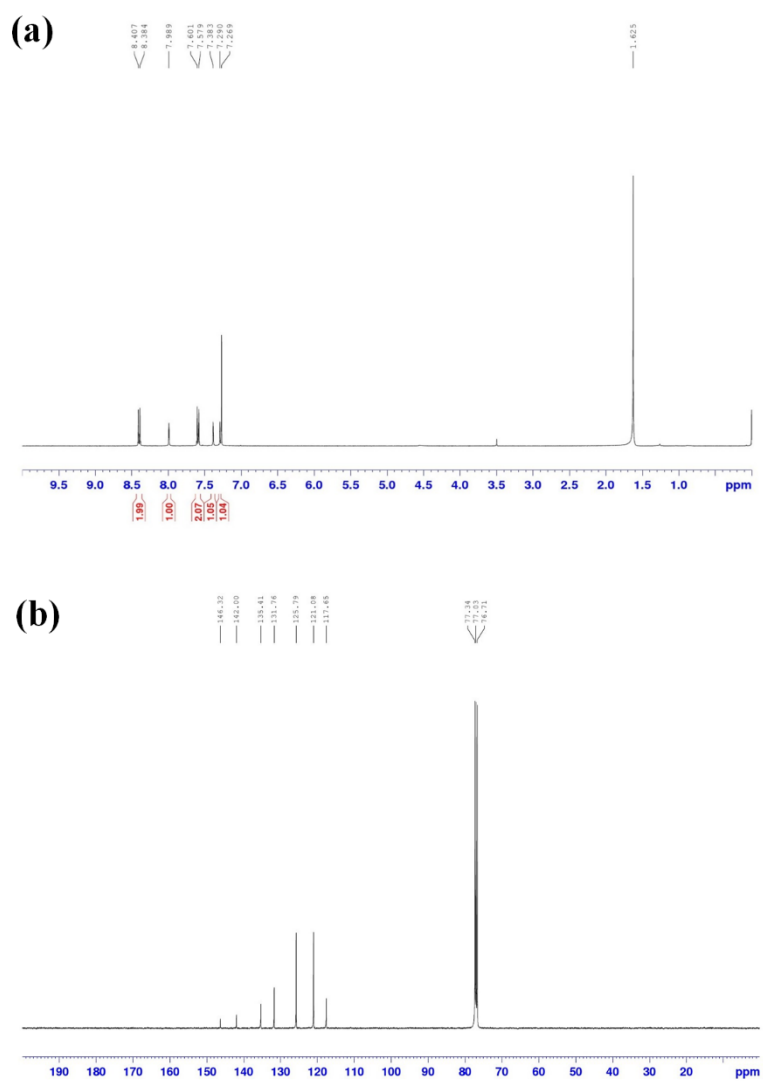

Figure S1d. (a)  $^1\text{H}$  and (b)  $^{13}\text{C}$  NMR spectra of 3d.

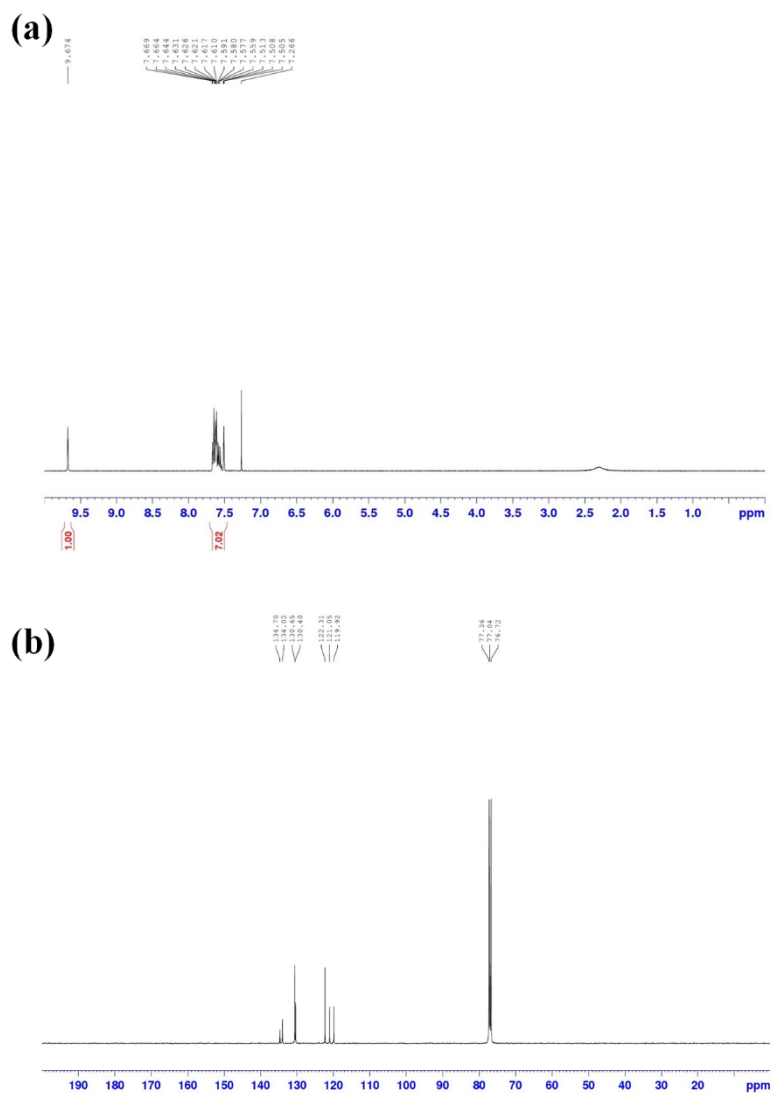

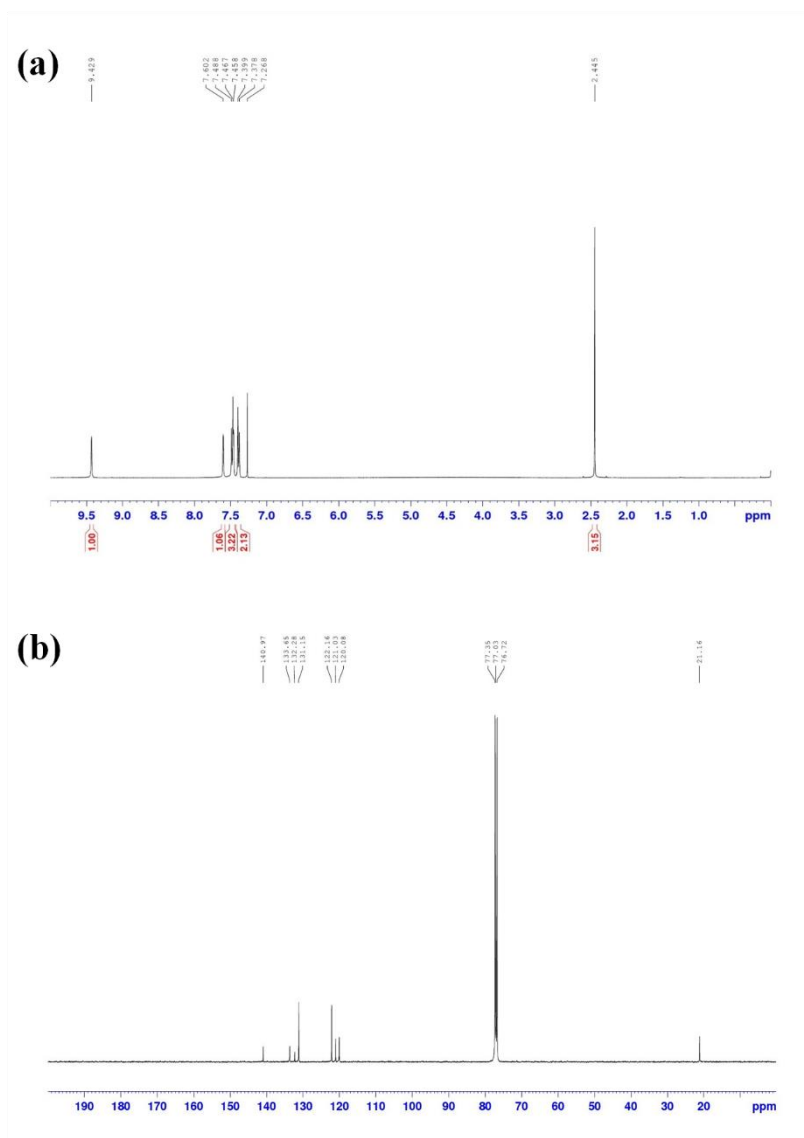

Figure S1f. (a)  $^1\text{H}$  and (b)  $^{13}\text{C}$  NMR spectra of 4b.

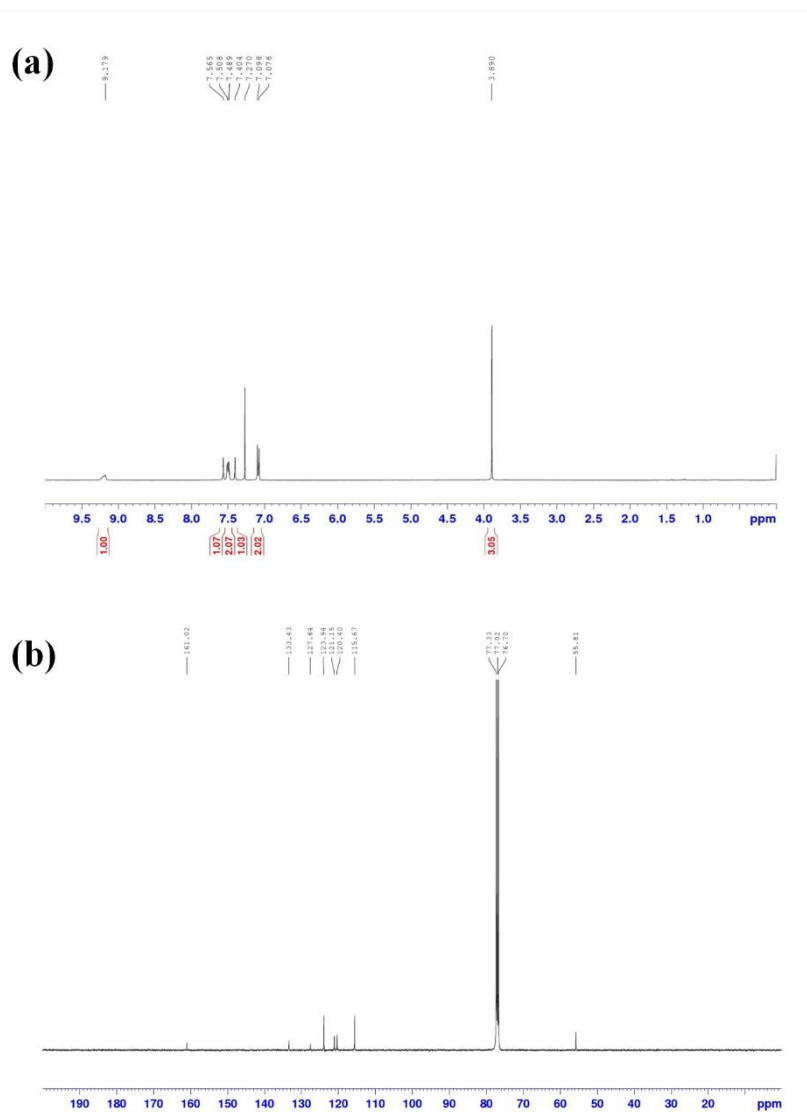

Figure S1g. (a)  $^1\text{H}$  and (b)  $^{13}\text{C}$  NMR spectra of 4c.



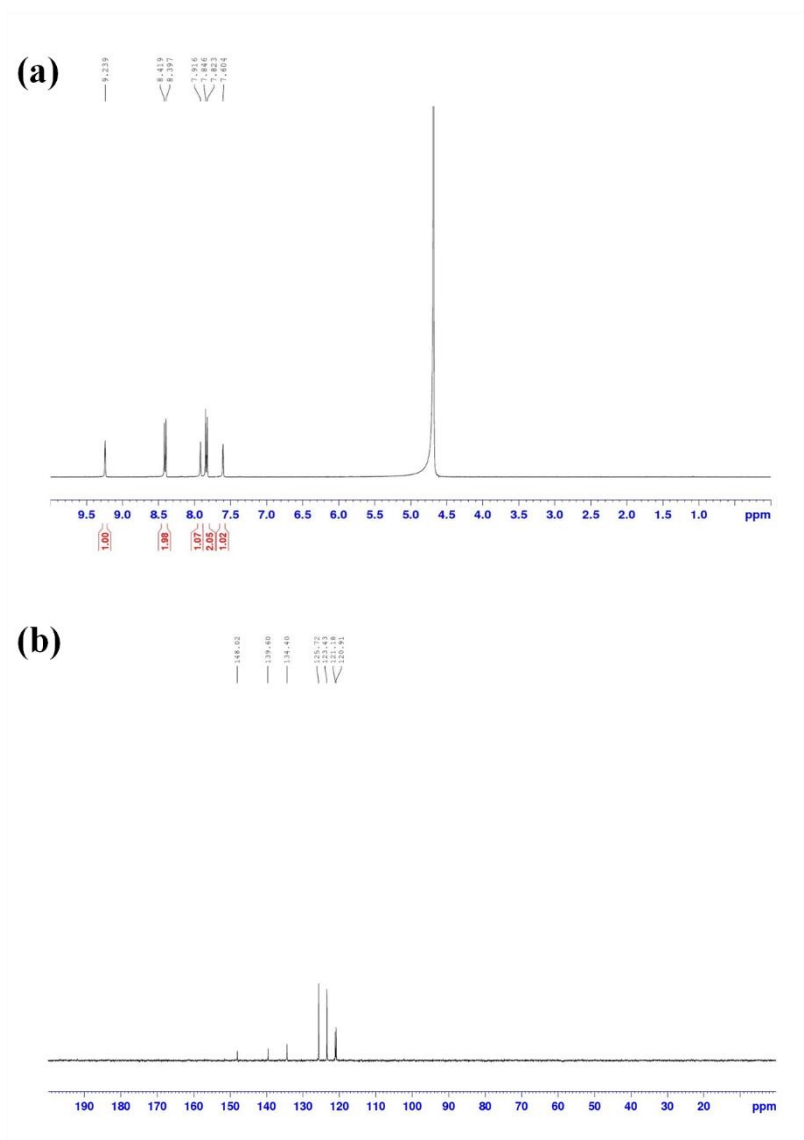

Figure S1h. (a)  $^1\text{H}$  and (b)  $^{13}\text{C}$  NMR spectra of 4d.

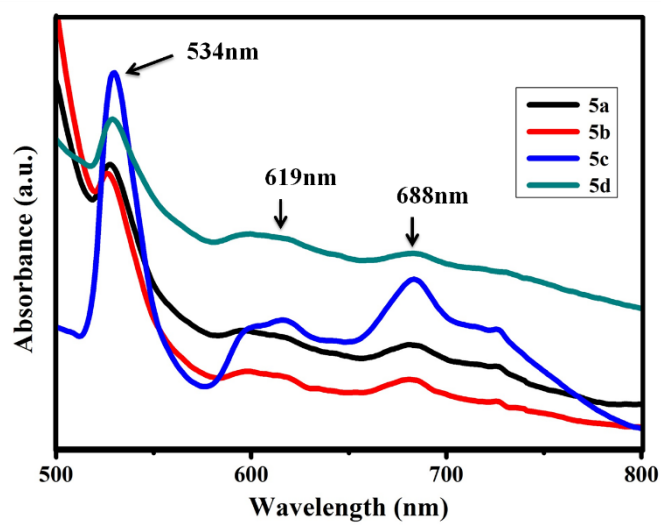

Figure S2. UV-Vis absorption spectra of B-L MILs 5a–5d (solvent:  $\text{CH}_3\text{CN}$ ).

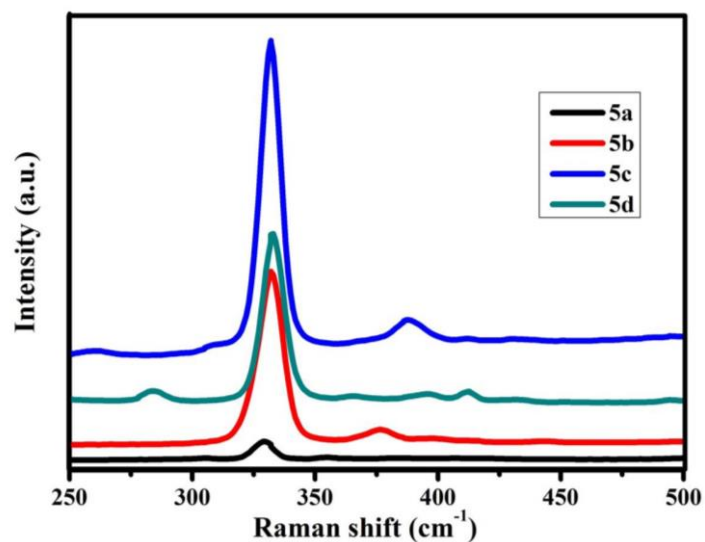

Figure S3. Raman spectra of B-L MILs 5a–5d.

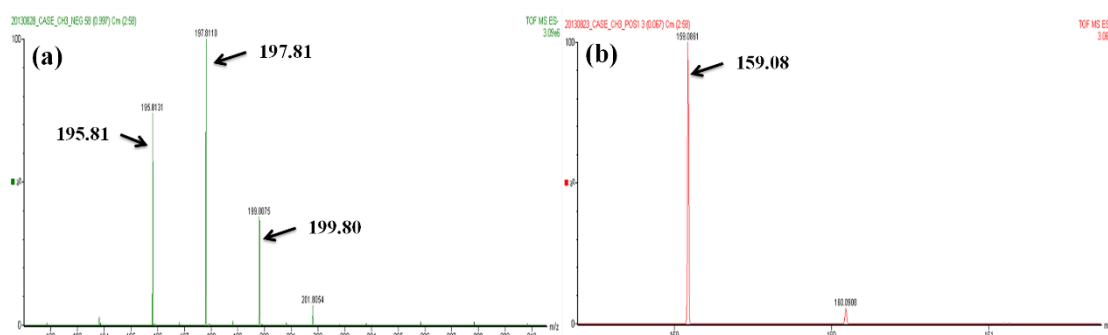

Figure S4a. Mass spectra (ionization source: electrospray ionization) of B-L MIL 5b. (a) Anion and (b) cation fragments.

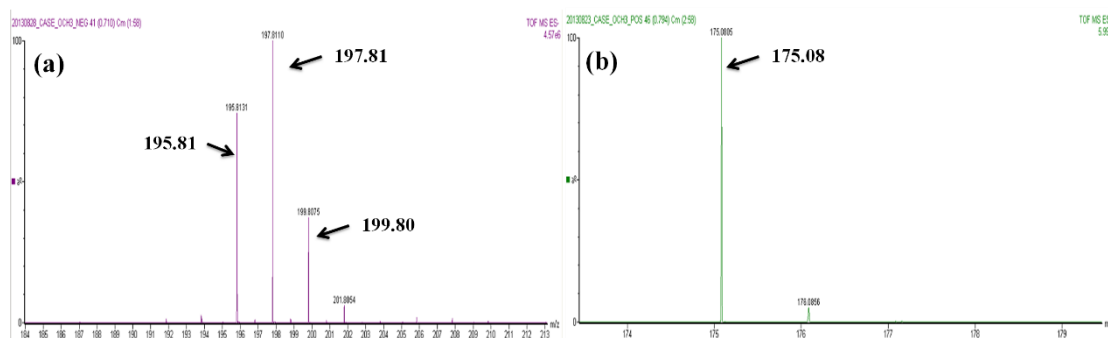

Figure S4b. Mass spectra (ionization source: electrospray ionization) of B-L MIL 5c. (a) Anion and (b) cation fragments.

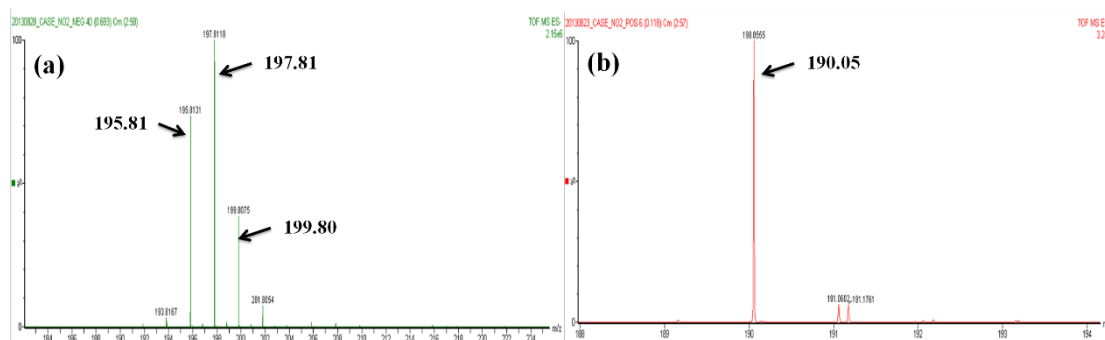

**Figure S4c.** Mass spectra (ionization source: electrospray ionization) of B-L MIL 5d. (a) Anion and (b) cation fragments.

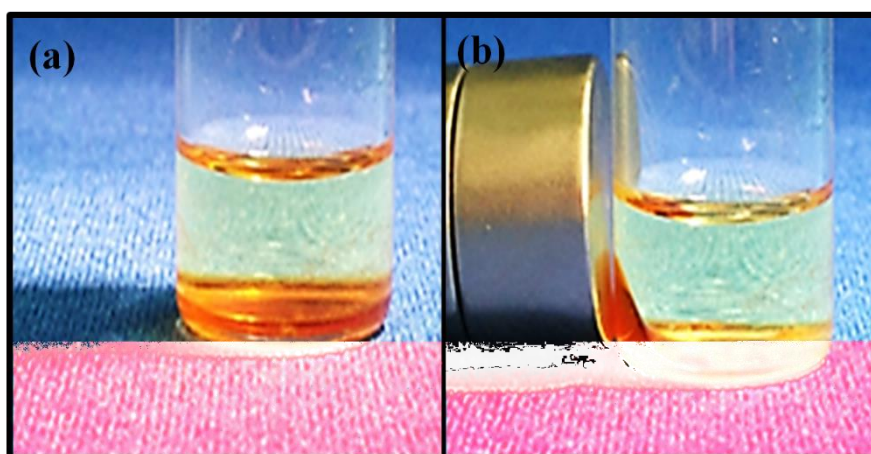

**Figure S5.** Photographs showing response of B-L MIL 5a to NdFeB (0.55-T) magnet. To show the displacement and distortion of 5a more clearly, ethyl ether was added to sample liquid. (a) Two layers of liquid, with ethyl ether at top and 5a at bottom, without magnet. (b) 5a attracted to magnet, becoming distorted.

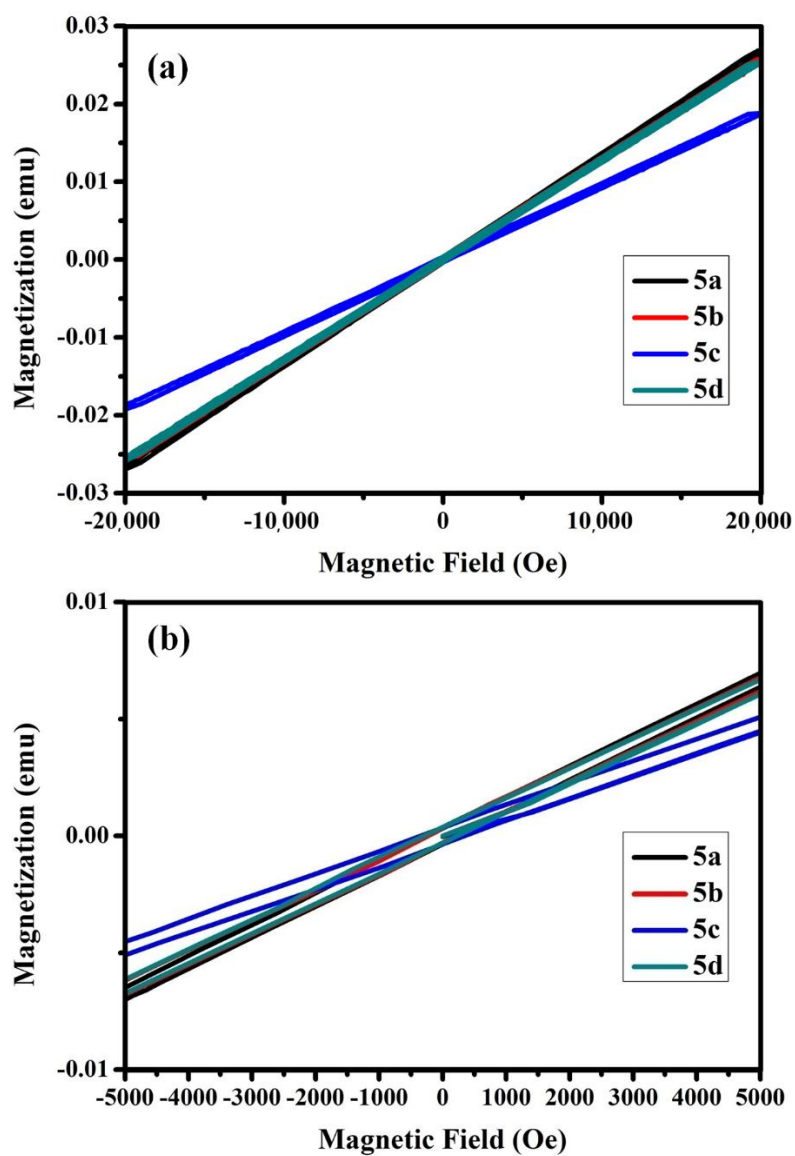

**Figure S6.** (a) Isothermal magnetization of all B-L MILs at 300 K. (b) enlarged view for magnetic fields of -5000 to 5000 Oe.
